FP387

**RENAL FUNCTION AND THE ASSOCIATED RISK OF BACTERAEMIA**

Nicholas Carlson<sup>1</sup>, Karl Emil Nelveg-Kristensen<sup>2</sup>, Thomas Sehested<sup>3</sup>, Mavish Safdar Chaudry<sup>4</sup>, Philip Andreas Schytz<sup>3</sup>, Gunnar Gislason<sup>1</sup>, Christian Torp-Pedersen<sup>5</sup>, Anne-Lise Kamper<sup>2</sup>

<sup>1</sup>The Danish Heart Foundation, Copenhagen, Denmark, <sup>2</sup>Copenhagen University Hospital Rigshospitalet, Copenhagen, Denmark, <sup>3</sup>Copenhagen University Hospital Gentofte, Copenhagen, Denmark, <sup>4</sup>Copenhagen University Hospital Herlev, Copenhagen, Denmark and <sup>5</sup>Aalborg University Hospital, Aalborg, Denmark

**INTRODUCTION:** Chronic kidney disease is associated with increased risk of infection; however, this has predominantly been demonstrated in patients on renal replacement therapy. Few studies in selected populations have previously shown a correlation of risk of all-cause infection with decline in renal function. The aim of the present study was to examine the relationship between estimated GFR (eGFR) and risk of bacteraemia in a nationwide population cohort with exclusion of patients on renal replacement therapy.

**METHODS:** Based on data from multiple nationwide health care registers, all patients with  $\geq 1$  recorded plasma creatinine measurement were identified in Denmark between 2008 and 2017. Patients entered the model following a 30-day quarantine period. All patients  $< 18$  years, patients with preceding renal replacement therapy, and patients with events within the 30 days quarantine period were excluded. eGFR was estimated using the CKD-EPI equation, and standardized one-years risk of bacteraemia were estimated based on G-computation of multiple cause-specific Cox regression models permitting comparison of risk across strata of renal dysfunction (eGFR [ml/min/1.73m<sup>2</sup>]  $> 90$ , 90–61, 60–46, 45–31, 30–16, and  $\leq 15$ , respectively).

**RESULTS:** A total of 3,020,717 eligible subjects were identified. Subjects were predominantly female (56%,  $n = 1,630,259$ ), with a median age of 50 years (IQR 32 – 65 years), and median eGFR of 95 ml/min/1.73m<sup>2</sup> (IQR 81 – 111 ml/min/1.73m<sup>2</sup>) (eGFR strata (%):  $> 90$ : 59.3%; 90–61: 33.8%; 60–46: 4.5%; 45–31: 1.7%; 30–16: 0.6%; and  $\leq 15$ : 0.1%.

Standardized one-year risks of bacteraemia were 1.49% (95% CI 1.48% - 1.51%), 1.58% (95% CI 1.56% - 1.59%), 2.07% (95% CI 2.03% - 2.11%), 2.65% (95% CI 2.59% - 2.70%), 3.59% (95% CI 3.47% - 3.67%), and 5.60% (95% CI 5.28% - 5.92%) in eGFR  $> 90$ , 90–61, 60–46, 45–31, 30–16, and  $\leq 15$ , respectively, corresponding to a risk ratio of 1.06 (1.04 – 1.07), 1.39 (1.36 – 1.42), 1.76 (1.73 – 1.81), 2.40 (2.30 – 2.46), and 3.76 (3.53 – 3.97) for eGFR 90–61, 60–46, 45–31, 30–16, and  $\leq 15$  using eGFR  $> 90$  as reference.

**CONCLUSIONS:** Renal dysfunction infers increased risk of infection. In a retrospective nationwide cohort of non-renal replacement therapy patients, lower eGFR was observed to be associated with a graded proportional increase in one-year risk of bacteraemia.

Figure 1: One-year risk of bacteraemia stratified by eGFR

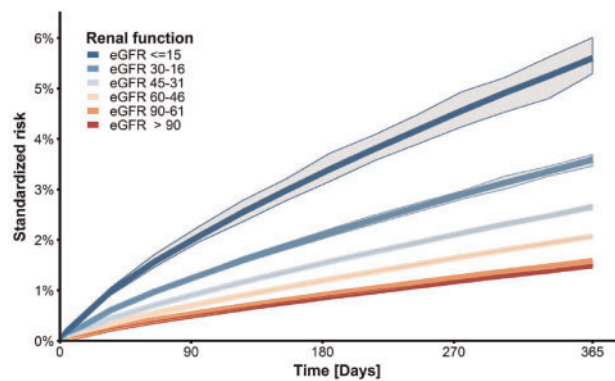

Source: http://academic.oup.com/ndt/article-pdf/34/Supplement_1/gfz106.FP387/28822365/gfz106.fp387.pdf
